# Supplementary material for: Rhizobium sp. IRBG74 Alters Arabidopsis Root Development by Affecting Auxin Signaling
Source: Front Microbiol. 2018 Jan 4;8:2556. doi: 10.3389/fmicb.2017.02556 (PMC5759036; doi:10.3389/fmicb.2017.02556)
Supplement: Supplementary file 2 [file Table2.XLSX]

## Sheet: Sheet1
Supplementary Table 2. Deferentially expressed genes at 48 hours.
gene_id	gene	IRGB-2C-1	IRGB-2C-2	IRGB-2C-3	IRGB-2T-1	IRGB-2T-2	IRGB-2T-3	Average of IRGB-2C	Average of IRGB-2T	log2(fold_change)	p_value	q_value
AT1G01680	ATPUB54	0	0	0	2.84297	2.12684	2.49615	0	2.48865	Inf	5e-05	0.000269263
AT1G01560	ATMPK11	0.146022	0.118141	0.113352	4.1236	4.03612	4.08703	0.125838	4.08225	5.01972	0.0005	0.00217279
AT1G02850	BGLU11	3.37253	3.36399	3.60938	31.9393	35.147	34.4187	3.44863	33.835	3.29442	5e-05	0.000269263
AT1G02920	ATGSTF7	30.9252	29.9646	26.0315	551.774	573.651	593.15	28.9738	572.858	4.30536	5e-05	0.000269263
AT1G02930	GSTF6	11.8268	12.2295	12.9716	545.528	634.846	599.527	12.3426	593.3	5.58704	5e-05	0.000269263
AT1G03870	FLA9	237.601	233.82	240.002	45.0251	52.0867	48.1075	237.141	48.4064	-2.29247	5e-05	0.000269263
AT1G04240	SHY2	14.9142	14.5039	13.7353	50.6908	51.1689	48.1991	14.3845	50.0196	1.79798	5e-05	0.000269263
AT1G04250	AXR3	126.015	129.714	128.532	270.674	269.098	267.576	128.087	269.116	1.0711	5e-05	0.000269263
AT1G04680	AT1G04680	49.9064	52.6428	49.8868	221.142	235.659	215.586	50.812	224.129	2.14109	5e-05	0.000269263
AT1G05660	AT1G05660	32.945	34.6309	34.9223	4.1928	3.29106	4.02716	34.1661	3.83701	-3.15451	5e-05	0.000269263
AT1G05710	AT1G05710	14.9643	18.2884	20.7498	72.2487	77.2066	78.6253	18.0008	76.0269	2.07845	5e-05	0.000269263
AT1G12080	AT1G12080	74.4254	75.2414	67.9419	12.5471	15.0741	13.5216	72.5362	13.7143	-2.40302	5e-05	0.000269263
AT1G15580	IAA5	0.464855	0.466097	0.466097	68.3831	66.684	65.1636	0.465683	66.7436	7.16314	0.00795	0.0239266
AT1G16510	AT1G16510	1.88101	2.56373	2.08124	0.576832	0.555682	0.570535	2.17533	0.567683	-1.93807	0.00075	0.0031123
AT1G17060	CYP72C1	12.6514	12.0229	11.8357	132.09	126.963	138.136	12.17	132.396	3.44346	5e-05	0.000269263
AT1G17190	ATGSTU26	129.626	124.436	124.573	33.2524	41.7521	35.0809	126.212	36.6951	-1.78218	5e-05	0.000269263
AT1G19220	ARF19	6.88472	6.98233	7.30599	17.4589	18.9088	19.0834	7.05768	18.4837	1.38899	5e-05	0.000269263
AT1G19790	SRS7	0.268294	0.401596	0.556587	1.77892	1.90221	2.23361	0.408826	1.97158	2.26979	5e-05	0.000269263
AT1G19900	AT1G19900	37.9715	40.023	36.7833	6.75542	7.8155	7.69148	38.2593	7.4208	-2.36616	5e-05	0.000269263
AT1G20850	XCP2	62.3257	61.4125	58.4045	20.1068	20.1446	17.4266	60.7142	19.226	-1.65898	5e-05	0.000269263
AT1G21110	AT1G21110	33.963	32.5133	37.082	106.144	107.093	118.66	34.5194	110.632	1.68029	5e-05	0.000269263
AT1G21120	AT1G21120	3.58678	4.28054	3.61425	41.7969	42.5171	44.6687	3.82719	42.9942	3.48979	5e-05	0.000269263
AT1G21130	AT1G21130	3.22839	3.74416	4.24611	32.7496	34.3273	33.3116	3.73955	33.4628	3.16162	5e-05	0.000269263
AT1G22530	PATL2	133.631	136.093	132.079	36.4104	44.6367	38.0933	133.934	39.7135	-1.75383	5e-05	0.000269263
AT1G23080	PIN7	14.0461	14.129	12.9099	46.5028	41.1543	43.8915	13.695	43.8495	1.67891	5e-05	0.000269263
AT1G25275	AT1G25275	36.9998	36.1534	40.2289	227.875	273.649	245.284	37.794	248.936	2.71954	5e-05	0.000269263
AT1G28290	AGP31	100.74	101.502	108.012	473.253	480.633	421.741	103.418	458.542	2.14857	5e-05	0.000269263
AT1G29500	AT1G29500	0.837026	1.02243	1.12095	11.4678	11.9082	12.2808	0.993469	11.8856	3.5806	5e-05	0.000269263
AT1G29510	SAUR68	0.657791	0.79946	0.460146	3.50891	3.22361	3.53363	0.639132	3.42205	2.42067	0.00255	0.00905237
AT1G30730	AT1G30730	7.373	8.24944	8.5144	80.7366	89.451	84.4155	8.04561	84.8677	3.39894	5e-05	0.000269263
AT1G30760	AT1G30760	8.0513	7.05654	7.18465	131.963	128.575	118.775	7.43083	126.438	4.08876	5e-05	0.000269263
AT1G31650	ATROPGEF14	5.0453	4.11024	3.97472	28.5433	31.4758	27.9958	4.37675	29.3383	2.74485	5e-05	0.000269263
AT1G33590	AT1G33590	8.20115	8.04315	7.54104	42.7179	47.7607	41.2743	7.92845	43.9176	2.46969	5e-05	0.000269263
AT1G33790	AT1G33790	3.69784	3.47373	3.44158	48.1887	45.5699	44.1351	3.53772	45.9646	3.69963	5e-05	0.000269263
AT1G34110	BRL3	4.36888	4.52602	4.27716	16.7807	18.5454	16.4198	4.39069	17.2486	1.97396	5e-05	0.000269263
AT1G37130	NIA2	65.1567	64.0134	63.6486	379.929	438.672	386.959	64.2729	401.853	2.64439	5e-05	0.000269263
AT1G43800	S-ACP-DES6	9.92098	12.2702	12.6178	43.5913	48.5619	44.0018	11.603	45.385	1.96772	5e-05	0.000269263
AT1G51420	ATSPP1	14.6077	15.0727	15.8458	47.8603	54.5075	55.5851	15.1754	52.651	1.79473	5e-05	0.000269263
AT1G51880	RHS6	3.00506	3.34712	3.20908	1.30436	1.64099	1.56428	3.18709	1.50321	-1.08419	5e-05	0.000269263
AT1G57590	AT1G57590	22.9505	24.7048	23.1632	4.15965	3.56276	4.83798	23.6062	4.1868	-2.49525	5e-05	0.000269263
AT1G60010	AT1G60010	23.2779	22.6769	21.3416	108.033	121.23	107.788	22.4321	112.35	2.32437	5e-05	0.000269263
AT1G60730	AT1G60730	17.1542	18.0211	17.2396	78.0382	83.8645	80.1569	17.4716	80.6865	2.20731	5e-05	0.000269263
AT1G62480	AT1G62480	438.943	445.567	446.307	74.9948	88.6055	70.6166	443.606	78.0723	-2.5064	5e-05	0.000269263
AT1G62770	AT1G62770	20.6303	20.0382	23.793	265.07	298.424	294.791	21.4872	286.095	3.73495	5e-05	0.000269263
AT1G64400	LACS3	4.44137	3.40548	3.35761	23.6662	21.9594	22.5283	3.73482	22.718	2.60472	5e-05	0.000269263
AT1G65310	ATXTH17	73.1258	73.7384	73.5149	8.73534	7.16914	9.29859	73.4597	8.40102	-3.12832	5e-05	0.000269263
AT1G67750	AT1G67750	14.683	15.305	15.6113	249.824	241.127	242.163	15.1998	244.371	4.00695	5e-05	0.000269263
AT1G69530	ATEXPA1	6.72141	7.87349	7.58178	181.529	205.298	199.054	7.39223	195.294	4.72349	5e-05	0.000269263
AT1G71110	AT1G71110	10.6515	10.2706	10.9607	46.0463	42.1742	47.8163	10.6276	45.3456	2.09315	5e-05	0.000269263
AT1G72200	ATL11	38.5862	38.3326	36.7322	8.46513	10.8706	10.8991	37.8837	10.0783	-1.91033	5e-05	0.000269263
AT1G75520	SRS5	1.96024	2.78832	2.07574	16.896	16.441	16.589	2.27477	16.642	2.87104	5e-05	0.000269263
AT1G75750	GASA1	514.044	564.956	578.316	92.0253	84.7161	95.1344	552.439	90.6253	-2.60783	5e-05	0.000269263
AT1G75780	TUB1	100.623	97.7922	100.933	26.9821	32.8773	28.3747	99.7827	29.4114	-1.76242	5e-05	0.000269263
AT1G76520	AT1G76520	5.82089	5.93206	5.14171	20.3346	21.3098	20.2534	5.63155	20.6326	1.87332	5e-05	0.000269263
AT1G76930	ATEXT4	23.969	27.5695	34.2371	126.647	115.124	115.113	28.5919	118.961	2.05682	5e-05	0.000269263
AT1G77120	ADH1	8.02893	9.31126	9.38835	89.8584	115.388	93.7238	8.90951	99.6567	3.48355	5e-05	0.000269263
AT1G77280	AT1G77280	10.262	10.3112	11.0577	46.8077	44.8715	51.5123	10.5436	47.7305	2.17854	5e-05	0.000269263
AT1G77690	LAX3	59.9041	61.6236	61.7425	230.215	201.494	226.605	61.0901	219.438	1.8448	5e-05	0.000269263
AT1G77760	NIA1	16.8635	15.4525	16.3459	254.398	299.018	269.012	16.2206	274.143	4.07902	5e-05	0.000269263
AT2G04160	AIR3	38.7197	41.2885	39.3758	173.013	180.801	182.692	39.7947	178.835	2.16798	5e-05	0.000269263
AT2G14960	GH3.1	3.5324	3.66835	3.94357	47.7165	53.6613	47.5141	3.71477	49.6306	3.73988	5e-05	0.000269263
AT2G16060	GLB1	11.7597	14.2252	12.9553	94.8009	103.849	107.288	12.9801	101.979	2.97391	5e-05	0.000269263
AT2G18120	SRS4	0.387653	0.115158	0.331437	1.20965	1.24118	1.21145	0.278083	1.22076	2.13419	0.00535	0.0171162
AT2G18470	PERK4	0.0242983	0.0362869	0.0348181	1.3498	1.67843	1.6026	0.0318011	1.54361	5.60109	0.0185	0.0486902
AT2G18690	AT2G18690	6.40638	6.83796	7.50133	57.6077	37.4082	57.0849	6.91522	50.7003	2.87415	5e-05	0.000269263
AT2G18980	AT2G18980	129.452	140.231	136.611	536.128	466.804	565.214	135.431	522.715	1.94846	5e-05	0.000269263
AT2G19970	AT2G19970	11.2525	12.4948	11.1724	1420.76	1521.17	1545.43	11.6399	1495.79	7.00568	5e-05	0.000269263
AT2G19990	PR-1-LIKE	3.73741	5.52221	3.78405	642.922	712.108	702.12	4.34789	685.717	7.30115	#N/A	#N/A
AT2G21400	SRS3	0.512212	0.273899	0.262759	2.32146	2.09124	1.95477	0.349623	2.12249	2.60188	0.0052	0.0167065
AT2G23170	GH3.3	2.07247	2.099	2.17913	214.371	253.304	227.095	2.11687	231.59	6.7735	5e-05	0.000269263
AT2G26330	ER	0.750599	0.678389	0.740465	2.4347	2.26755	2.73226	0.723151	2.47817	1.77691	5e-05	0.000269263
AT2G26700	PID2	2.68951	2.69608	2.09417	4.45982	4.76423	4.75802	2.49325	4.66069	0.902514	5e-05	0.000269263
AT2G28160	FIT1	39.9986	40.93	41.2699	7.49796	7.97469	7.66526	40.7328	7.71264	-2.4009	5e-05	0.000269263
AT2G30040	MAPKKK14	7.23833	6.81699	6.84274	19.3026	19.8326	19.6747	6.96602	19.6033	1.49269	5e-05	0.000269263
AT2G30670	AT2G30670	0	0	0	4.786	3.63623	5.16585	0	4.52936	Inf	5e-05	0.000269263
AT2G30750	CYP71A12	1.6791	2.2665	2.34529	189.181	201.452	199.432	2.09696	196.688	6.55147	5e-05	0.000269263
AT2G30770	CYP71A13	0	0	0	1.15858	1.42488	2.11629	0	1.56658	Inf	5e-05	0.000269263
AT2G33790	ATAGP30	76.6055	79.9521	78.1204	5.83235	6.90123	7.50818	78.226	6.74725	-3.53528	5e-05	0.000269263
AT2G34650	PID	2.79164	3.29742	2.49782	14.2408	14.4488	15.171	2.86229	14.6202	2.35272	5e-05	0.000269263
AT2G35770	scpl28	14.0004	15.7815	16.7363	81.382	94.7864	84.0386	15.5061	86.7357	2.48379	5e-05	0.000269263
AT2G37180	RD28	111.823	121.741	114.795	24.9672	27.5109	26.4618	116.12	26.3133	-2.14175	5e-05	0.000269263
AT2G38390	PER23	75.9926	75.0424	74.5435	322.097	379.435	357.071	75.1928	352.868	2.23046	5e-05	0.000269263
AT2G38860	YLS5	18.4962	18.6464	17.9114	80.0015	84.639	76.9321	18.3513	80.5242	2.13354	5e-05	0.000269263
AT2G38870	AT2G38870	28.2963	42.2323	32.6916	164.119	157.615	155.374	34.4067	159.036	2.20859	5e-05	0.000269263
AT2G39370	MAKR4	9.87621	9.67147	9.75349	65.3376	69.5391	65.8918	9.76706	66.9228	2.7765	5e-05	0.000269263
AT2G39380	ATEXO70H2	10.4116	8.8712	10.2167	41.8834	44.9592	40.4946	9.83317	42.4457	2.10989	5e-05	0.000269263
AT2G39700	ATEXPA4	19.7928	21.8383	18.3342	88.6593	89.3069	79.7201	19.9884	85.8954	2.10342	5e-05	0.000269263
AT2G41100	TCH3	4.46092	6.08616	5.14344	106.42	129.054	120.523	5.23017	118.666	4.5039	5e-05	0.000269263
AT2G41380	AT2G41380	26.3566	25.3951	26.6081	141.752	153.957	151.763	26.1199	149.157	2.51361	5e-05	0.000269263
AT2G43570	CHI	8.05289	8.16322	7.75532	67.8849	90.9702	79.6296	7.99048	79.4949	3.31451	5e-05	0.000269263
AT2G43590	AT2G43590	40.8363	38.3837	41.258	782.021	839.881	829.003	40.1593	816.968	4.34647	5e-05	0.000269263
AT2G45400	BEN1	24.0683	22.7023	23.5806	81.9293	81.5748	82.4058	23.4504	81.97	1.80548	5e-05	0.000269263
AT2G46740	AT2G46740	12.7808	12.0782	12.3889	58.3801	54.9756	60.3051	12.416	57.8869	2.22104	5e-05	0.000269263
AT2G46750	AT2G46750	10.9706	10.0075	10.5284	32.6854	34.0351	32.9755	10.5022	33.232	1.66189	5e-05	0.000269263
AT2G47260	WRKY23	3.49024	3.26747	3.73956	53.4775	54.1218	48.3076	3.49909	51.969	3.8926	5e-05	0.000269263
AT2G47550	PME20	8.35182	8.66085	8.64266	40.017	46.7305	41.179	8.55178	42.6422	2.31798	5e-05	0.000269263
AT3G01190	PER27	305.838	299.323	293.706	33.5043	36.1988	36.0416	299.622	35.2482	-3.08752	5e-05	0.000269263
AT3G02550	LBD41	7.82218	8.88984	7.99321	40.9453	43.0249	40.0204	8.23508	41.3302	2.32734	5e-05	0.000269263
AT3G07010	AT3G07010	36.093	35.6433	38.5019	11.4357	11.6161	10.7563	36.7461	11.2694	-1.70518	5e-05	0.000269263
AT3G07390	AIR12	17.2861	16.1341	20.1305	187.434	180.36	167.466	17.8502	178.42	3.32126	5e-05	0.000269263
AT3G09390	MT2A	59.2323	66.0773	65.0849	264.049	245.058	229.298	63.4648	246.135	1.95542	5e-05	0.000269263
AT3G10720	PME25	25.9794	28.9081	27.3626	107.186	104.67	105.117	27.4167	105.658	1.94627	5e-05	0.000269263
AT3G13380	BRL3	8.8503	8.68941	8.40014	45.9035	50.4142	47.5004	8.64662	47.9394	2.471	5e-05	0.000269263
AT3G13610	F6'H1	41.3127	40.1703	39.9153	220.365	242.469	227.901	40.4661	230.245	2.50838	5e-05	0.000269263
AT3G14060	AT3G14060	14.5583	16.2825	13.6439	85.3235	96.2952	88.0593	14.8282	89.8927	2.59986	5e-05	0.000269263
AT3G15340	PPI2	1.67843	1.60798	1.69355	24.0642	24.4538	24.3112	1.65999	24.2764	3.87031	5e-05	0.000269263
AT3G15540	IAA19	4.40647	4.12742	3.71246	32.6621	31.2098	30.3473	4.08212	31.4064	2.94367	5e-05	0.000269263
AT3G16500	PAP1	11.9301	10.9278	10.2	66.559	63.5071	59.717	11.0193	63.261	2.52128	5e-05	0.000269263
AT3G16770	RAP2.3	12.426	12.6002	12.5702	48.4161	58.6592	51.9004	12.5321	52.9919	2.08014	5e-05	0.000269263
AT3G19200	AT3G19200	7.85347	6.35911	6.21579	69.5431	79.7676	77.6933	6.80946	75.668	3.47407	5e-05	0.000269263
AT3G19710	BCAT4	6.84854	5.83813	4.84021	45.3424	43.7367	42.3548	5.84229	43.8113	2.9067	5e-05	0.000269263
AT3G23510	AT3G23510	27.8276	29.2426	27.8607	6.36777	5.8412	6.67678	28.3103	6.29525	-2.16899	5e-05	0.000269263
AT3G26200	CYP71B22	0	0	0	6.31873	5.74003	7.09005	0	6.38294	Inf	5e-05	0.000269263
AT3G27170	CLC-B	30.8115	32.8257	34.005	5.34857	6.6287	6.00209	32.5474	5.99312	-2.44116	5e-05	0.000269263
AT3G43190	SUS4	7.09303	7.48637	6.59104	31.916	35.1528	31.5361	7.05681	32.8683	2.21961	5e-05	0.000269263
AT3G44300	NIT2	8.40797	7.72632	9.0204	95.3186	119.346	105.186	8.3849	106.617	3.6685	5e-05	0.000269263
AT3G45700	AT3G45700	30.748	30.1138	31.8891	6.97025	7.85437	8.87358	30.917	7.8994	-1.96858	5e-05	0.000269263
AT3G45710	AT3G45710	88.8439	86.5248	87.436	27.0186	30.7656	29.2508	87.6016	29.0117	-1.59432	5e-05	0.000269263
AT3G48740	SWEET11	43.595	46.9858	43.482	11.9671	12.7944	10.227	44.6876	11.6628	-1.93796	5e-05	0.000269263
AT3G51060	STY1	0.443004	0.273286	0.349625	1.23498	1.30892	1.33639	0.355305	1.29343	1.86407	5e-05	0.000269263
AT3G53980	AT3G53980	552.764	579.025	580.954	116.111	138.291	135.023	570.914	129.808	-2.13689	5e-05	0.000269263
AT3G54040	AT3G54040	46.1508	53.0763	49.1696	171.648	178.927	188.77	49.4656	179.782	1.86175	5e-05	0.000269263
AT3G54260	TBL36	15.0525	13.5398	13.9016	46.5784	57.7048	50.5956	14.1646	51.6263	1.86581	5e-05	0.000269263
AT3G60120	BGLU27	0	0	0	2.29951	2.47787	2.63607	0	2.47115	Inf	5e-05	0.000269263
AT3G61430	PIP1A	753.98	794.211	793.264	145.6	170.083	148.948	780.485	154.877	-2.33325	5e-05	0.000269263
AT3G61820	AT3G61820	21.4651	21.7508	21.8826	67.3576	69.3233	63.2024	21.6995	66.6278	1.61846	5e-05	0.000269263
AT3G62100	IAA30	1.91677	1.7499	1.43895	12.8911	12.1783	11.0791	1.70187	12.0495	2.82378	5e-05	0.000269263
AT4G00080	UNE11	34.4213	34.523	33.121	275.193	352.476	311.781	34.0218	313.15	3.20232	5e-05	0.000269263
AT4G02330	ATPMEPCRB	2.02284	1.71169	2.05299	20.8226	22.6713	21.2674	1.92917	21.5871	3.48411	5e-05	0.000269263
AT4G02520	ATGSTF2	80.5288	75.903	76.082	284.442	289.963	288.32	77.5046	287.575	1.89158	5e-05	0.000269263
AT4G03420	AT4G03420	7.51904	6.69991	6.54994	33.221	31.3323	34.0296	6.92296	32.861	2.24691	5e-05	0.000269263
AT4G08950	EXO	8.83013	9.58374	9.68901	53.9386	58.9789	51.0983	9.36763	54.6719	2.54504	5e-05	0.000269263
AT4G12520	AT4G12520	97.418	99.5656	98.2865	11.4245	5.69592	9.1931	98.4234	8.77117	-3.48816	5e-05	0.000269263
AT4G12545	AT4G12545	129.994	133.914	127.219	973.452	869.289	1062.81	130.376	968.517	2.8931	5e-05	0.000269263
AT4G12550	AIR1	137.808	145.407	139.753	2001.72	1667.51	2113.9	140.989	1927.71	3.77323	5e-05	0.000269263
AT4G12910	scpl20	7.21599	6.91655	6.93153	33.9326	29.5703	32.4926	7.02136	31.9985	2.18818	5e-05	0.000269263
AT4G14550	IAA14	46.3447	49.1831	44.0654	160.885	166.542	167.417	46.5311	164.948	1.82575	5e-05	0.000269263
AT4G14560	IAA1	12.8442	14.36	13.8767	95.0963	107.098	102.712	13.6936	101.635	2.89183	5e-05	0.000269263
AT4G15160	DL3625W	59.8981	66.378	77.183	797.14	816.245	810.525	67.8197	807.97	3.57453	5e-05	0.000269263
AT4G17340	TIP2%3B2	1096.37	1203.13	1202.41	144.529	137.596	144.687	1167.3	142.271	-3.03647	5e-05	0.000269263
AT4G21850	ATMSRB9	198.985	212.54	201.802	70.5345	68.6065	70.4717	204.442	69.8709	-1.54893	5e-05	0.000269263
AT4G22666	AT4G22666	100.727	109.838	113.25	29.6691	30.7609	31.8606	107.938	30.7635	-1.81091	5e-05	0.000269263
AT4G23400	PIP1D	251.145	263.673	257.014	52.9698	61.1917	58.154	257.277	57.4385	-2.16323	5e-05	0.000269263
AT4G26890	MAPKKK16	2.04111	1.7383	1.88257	0.80763	1.10086	0.801539	1.88733	0.903343	-1.063	0.00015	0.000739533
AT4G27260	GH3.5	22.8039	21.1256	21.3538	386.909	481.373	427.115	21.7611	431.799	4.31054	5e-05	0.000269263
AT4G27450	AT4G27450	11.5927	10.448	9.68575	53.0612	58.5358	60.154	10.5755	57.2503	2.43656	5e-05	0.000269263
AT4G28640	IAA11	7.29484	6.24992	6.46853	18.8933	19.0766	21.7715	6.6711	19.9138	1.57777	5e-05	0.000269263
AT4G29180	RHS16	12.7266	12.7431	12.7502	4.3521	4.33684	4.54076	12.74	4.4099	-1.53054	5e-05	0.000269263
AT4G30080	ARF16	14.8215	12.8916	13.5104	34.4408	37.9084	37.7652	13.7412	36.7048	1.41746	5e-05	0.000269263
AT4G30140	CDEF1	11.2499	11.7632	11.3399	694.867	762.693	711.778	11.451	723.113	5.98067	5e-05	0.000269263
AT4G32280	IAA29	1.00434	1.00344	1.12703	5.0891	5.6724	6.00544	1.04494	5.58898	2.41917	5e-05	0.000269263
AT4G33070	AT4G33070	9.50047	9.58278	10.0397	56.4027	63.5529	61.1295	9.70765	60.3617	2.63644	5e-05	0.000269263
AT4G34710	ADC2	55.8879	54.817	55.8955	343.756	360.273	345.581	55.5335	349.87	2.65539	5e-05	0.000269263
AT4G36260	STY2	0.812	0.799727	1.2058	3.10984	3.08942	2.81154	0.939176	3.0036	1.67723	5e-05	0.000269263
AT4G36430	PER49	4.75209	4.56033	3.6254	54.758	61.0638	55.9402	4.31261	57.254	3.73074	5e-05	0.000269263
AT4G37160	sks15	61.5385	62.1763	63.8115	17.3055	19.316	17.8644	62.5088	18.162	-1.78314	5e-05	0.000269263
AT4G37390	YDK1	17.7976	17.9775	17.3155	360.796	436.979	395.43	17.6969	397.735	4.49024	5e-05	0.000269263
AT4G37900	AT4G37900	2.91136	2.58445	3.06501	32.4899	33.5617	33.4644	2.85361	33.172	3.53911	5e-05	0.000269263
AT4G39330	ATCAD9	4.00807	4.6614	4.89348	29.4429	24.5648	22.5997	4.52098	25.5358	2.49781	5e-05	0.000269263
AT5G01330	PDC3	14.6441	15.3877	14.6623	1.92723	2.15089	1.91462	14.898	1.99758	-2.8988	5e-05	0.000269263
AT5G01870	LTP10	9.96878	9.52011	11.6889	85.3318	113.602	108.052	10.3926	102.329	3.29958	5e-05	0.000269263
AT5G03670	AT5G03670	13.1954	12.6925	11.9309	43.4914	46.4513	42.2291	12.6063	44.0573	1.80524	5e-05	0.000269263
AT5G05730	ASA1	14.4651	14.6783	13.9399	42.0009	44.2081	44.3392	14.3611	43.5161	1.59938	5e-05	0.000269263
AT5G06860	PGIP1	29.795	28.8712	29.1415	422.679	418.207	440.311	29.2692	427.066	3.867	5e-05	0.000269263
AT5G12330	LRP1	2.66005	2.48494	2.44004	17.0831	17.0995	18.3736	2.52834	17.5187	2.79263	5e-05	0.000269263
AT5G13210	AT5G13210	2.76383	2.59581	2.39496	16.7201	18.1798	17.5831	2.58487	17.4943	2.75873	5e-05	0.000269263
AT5G13490	AAC2	24.8519	23.2292	24.8679	99.4538	109.116	103.79	24.3163	104.12	2.09825	5e-05	0.000269263
AT5G14650	AT5G14650	1.27941	1.56349	1.26577	54.947	72.5563	59.6982	1.36956	62.4005	5.50978	5e-05	0.000269263
AT5G15180	AT5G15180	66.0945	58.5387	58.7451	12.4668	14.8169	11.3657	61.1261	12.8831	-2.24631	5e-05	0.000269263
AT5G16530	PIN5	3.93064	4.41641	3.72591	1.34568	1.28904	1.26603	4.02432	1.30025	-1.62996	5e-05	0.000269263
AT5G17760	AT5G17760	6.48065	5.70566	6.4109	26.5649	29.5533	32.0947	6.19907	29.4043	2.2459	5e-05	0.000269263
AT5G18170	GDH1	24.2121	23.661	23.0213	84.7521	91.7555	84.4175	23.6315	86.975	1.87989	5e-05	0.000269263
AT5G20045	AT5G20045	6.69304	6.01667	5.62377	84.6433	82.1977	77.6478	6.11116	81.4963	3.73722	5e-05	0.000269263
AT5G20830	SUS1	19.3647	18.736	19.8864	63.663	76.422	70.6309	19.329	70.2386	1.8615	5e-05	0.000269263
AT5G22500	FAR1	3.77238	3.84958	3.49298	18.5967	20.5072	21.6136	3.70498	20.2392	2.44961	5e-05	0.000269263
AT5G23990	ATFRO5	18.9423	20.032	20.2266	3.64417	2.91504	3.18902	19.7336	3.24941	-2.60241	5e-05	0.000269263
AT5G25460	AT5G25460	80.6222	80.5454	80.6537	528.922	555.479	544.465	80.6071	542.955	2.75185	5e-05	0.000269263
AT5G37990	AT5G37990	13.7815	16.3556	17.1196	68.2083	53.165	65.5525	15.7522	62.3086	1.98387	5e-05	0.000269263
AT5G38200	AT5G38200	3.95553	3.34815	3.63529	76.3594	50.7911	67.6896	3.64632	64.9467	4.15474	5e-05	0.000269263
AT5G39580	PER62	1.72264	2.08833	1.79822	89.0859	103.315	93.6434	1.86973	95.3481	5.6723	5e-05	0.000269263
AT5G40590	AT5G40590	7.7232	6.82555	6.71235	90.9976	88.8333	98.0876	7.08703	92.6395	3.70837	5e-05	0.000269263
AT5G40780	LHT1	25.4057	25.3979	22.986	92.2311	79.5257	85.2514	24.5965	85.6694	1.80032	5e-05	0.000269263
AT5G41750	AT5G41750	1.03632	0.7697	0.816508	8.47716	7.43549	8.55497	0.874176	8.15587	3.22184	5e-05	0.000269263
AT5G42830	AT5G42830	5.85403	5.87177	7.09131	34.4472	33.65	34.6399	6.27237	34.2457	2.44884	5e-05	0.000269263
AT5G44020	AT5G44020	446.688	431.489	440.661	93.8392	124.146	104.003	439.613	107.329	-2.03419	5e-05	0.000269263
AT5G46330	FLS2	0.195817	0.186939	0.179379	4.51623	4.81826	4.80829	0.187378	4.71426	4.65301	5e-05	0.000269263
AT5G47450	ATTIP2%3B3	338.441	364.866	358.947	21.937	20.8561	20.8979	354.085	21.2303	-4.0599	5e-05	0.000269263
AT5G49360	BXL1	26.3303	28.2744	27.1052	5.08252	5.48503	5.27587	27.2366	5.28114	-2.36663	5e-05	0.000269263
AT5G50300	AZG2	7.23314	7.89048	7.16186	37.1564	35.5129	35.7867	7.42849	36.152	2.28293	5e-05	0.000269263
AT5G52310	COR78	19.9486	19.9071	18.909	3.54749	3.46428	2.93332	19.5882	3.31503	-2.56289	5e-05	0.000269263
AT5G52860	ABCG8	0	0	0	2.96526	2.47528	2.33805	0	2.59286	Inf	5e-05	0.000269263
AT5G53250	AGP22	150.31	156.443	147.381	26.1155	17.0208	24.4682	151.378	22.5348	-2.74793	5e-05	0.000269263
AT5G54490	PBP1	13.9914	10.1668	12.4825	120.584	158.709	134.576	12.2136	137.956	3.49766	5e-05	0.000269263
AT5G54510	GH3.6	22.2077	20.4544	22.0879	237.666	277.909	253.444	21.5833	256.34	3.57007	5e-05	0.000269263
AT5G55050	AT5G55050	13.4674	13.3705	15.6324	295.103	305.905	328.694	14.1568	309.901	4.45224	5e-05	0.000269263
AT5G56540	AGP14	307.62	337.426	333.735	48.1648	44.9578	57.2612	326.26	50.1279	-2.70234	5e-05	0.000269263
AT5G56870	BGAL4	119.323	120.302	117.155	29.5469	34.7081	34.0079	118.927	32.7543	-1.86032	5e-05	0.000269263
AT5G57350	HA3	17.3339	18.6114	17.8799	57.5303	72.2731	62.9469	17.9417	64.2501	1.84038	5e-05	0.000269263
AT5G57420	IAA33	5.80039	5.06729	5.74486	2.02028	2.2348	1.99776	5.53751	2.08428	-1.40969	5e-05	0.000269263
AT5G57520	ZFP2	0	0	0	6.16587	7.70721	8.36659	0	7.41322	Inf	5e-05	0.000269263
AT5G60660	PIP2F	135.954	143.526	138.718	17.638	17.0579	17.3977	139.399	17.3645	-3.00501	5e-05	0.000269263
AT5G60950	COBL5	44.5942	46.3534	44.789	210.146	254.224	224.171	45.2455	229.514	2.34273	5e-05	0.000269263
AT5G61010	ATEXO70E2	11.3326	11.0642	11.0555	38.9614	40.1988	41.2199	11.1508	40.1267	1.84742	5e-05	0.000269263
AT5G62340	AT5G62340	57.6079	55.4525	59.0305	10.2482	9.54661	8.09078	57.3636	9.2952	-2.62558	5e-05	0.000269263
AT5G62350	AT5G62350	38.5194	37.6512	39.0545	120.493	132.611	122.978	38.4084	125.361	1.70659	5e-05	0.000269263
AT5G64120	PER71	187.761	197.348	195.239	1573.32	1849.37	1671.61	193.449	1698.1	3.13389	5e-05	0.000269263
AT5G65640	bHLH093	24.1531	25.9714	25.759	186.1	161.415	191.617	25.2945	179.711	2.82878	5e-05	0.000269263
AT5G65980	AT5G65980	0.273753	0.399178	0.319164	1.3464	1.63012	1.42196	0.330698	1.46616	2.14845	0.00015	0.000739533
AT5G66350	SHI	0.824064	0.719309	0.690182	2.18962	2.00678	1.85334	0.744518	2.01658	1.43753	5e-05	0.000269263
XLOC_024152	BETA-OHASE	9.29467	9.27794	8.51232	42.52	47.8698	45.3085	9.02831	45.2328	2.32484	5e-05	0.000269263
XLOC_024459	AT4G31320	44.207	44.1724	44.3062	11.9752	12.0729	10.1956	44.2285	11.4146	-1.9541	5e-05	0.000269263
